# Supplementary material for: Hitting The Bullseye: The Psychometric Properties of the Assessment of Burden of Chronic Conditions (ABCC)-Scale in The Netherlands
Source: Research Square preprint supplement (doi:10.21203/rs.3.rs-861720/v1), 2021-09-20
Supplement: Supplementary file 1 [file 1cb518d0fd35f226ba1bd629.docx]

**Additional file 3**. **Questionnaire outcomes per condition**

| **Questionnaire** | **T0** | **T1** |
| --- | --- | --- |
| **COPD** | **n=65** | **n=60** |
| T1-T0, days, median (IQR) | 17 (15.0-20.0) | |
| ABCC scale**a**, median (IQR), range 0-6   - Total - Fatigue - Night’s rest - Feelings/emotions - Medicines - Physical limitations - Relations and work - Sexuality - Pulmonary complaints | 2.4 (1.5-3.0)  3.0 (2.0-4.5)  2.0 (1.0-3.0)  1.3 (0.7-2.3)  0.0 (0.0-1.0)  3.0 (2.0-4.3)  2.0 (1.0-4.0)  2.0 (0.0-4.0)  2.8 (2.0-3.5) | 2.4 (1.4-2.9)  3.0 (2.0-4.0)  2.0 (1.0-3.0)  1.3 (0.7-2.3)  0.0 (0.0-1.0)  3.3 (2.3-4.3)  2.0 (1.0-3.0)  2.0 (1.0-4.0)  2.8 (2.0-3.8) |
| SGRQ**b**, median (IQR), range 0-100   - Total - Symptoms - Activity - Impact | 53.3 (38.0-64.0)  62.2 (38.1-73.3)  21.0 (14.2-40.5)  40.2 (25.4-48.0) | |
| HADS**c**, median (IQR), range 0-21   - Total - Depression subscale - Anxiety subscale | 7.0 (3.5-13.5)  3.0 (1.0-7.0)  4.0 (2.0-7.0) | |
| **Asthma** | **n=62** | **n=50** |
| T1-T0, days, median (IQR) | 17 (16-19) | |
| ABCC scale, median (IQR), range 0-6   - Total - Fatigue - Night’s rest - Feelings/emotions - Medicines - Physical limitations - Relations and work - Sexuality - Asthma complaints - Nasal complaints | 2.3 (1.5-2.9)  3.0 (0.0-6.0)  3.0 (1.0-5.0)  1.3 (0.0-3.0)  1.0 (0.0-2.0)  2.2 (1.3-3.0)  2.0 (0.0-4.0)  2.0 (0.0-5.0)  2.5 (1.2-3.3)  3.0 (0.0-6.0) | 2.2 (1.5-2.8)  3.0 (2.0-4.0)  2.0 (2.0-3.0)  1.3 (0.6-1.7)  1.0 (0.0-1.0)  2.0 (1.0-2.7)  2.0 (1.0-3.0)  1.0 (0.0-3.0)  2.5 (1.5-3.4)  3.0 (2.0-4.0) |
| AQLQ-Standardized**d**, median (IQR) ⁋, range 0-7   - Total - Symptoms - Activity limitation - Emotional function - Environmental exposure | 5.2 (4.2-5.9)  5.0 (4.1-5.9)  4.9 (3.9-5.8)  6.0 (5.2-6.4)  5.0 (3.9-5.8) | |
| **T2DM** | **n=60** | **n=53** |
| T1-T0, days, median (IQR) | 18 (15.5-21.5) | |
| ABCC scale, median (IQR), range 0-6   - Total - Fatigue - Night’s rest - Feelings/emotions - Medicines - Physical limitations - Relations and work - Sexuality - Hypoglycaemia - Worry about blood glucose - Leg- and feet complaints - Eating and drinking | 1.4 (0.9-2.2)  3.0 (1.0-3.8)  2.0 (1.0-3.0)  1.0 (0.5-2.0)  1.0 (0.0-2.0)  1.7 (0.7-3.0)  1.0 (0.0-2.0)  1.0 (0.0-3.0)  1.0 (0.0-2.0)  1.0 (1.0-2.0)  1.0 (0.0-3.8)  2.0 (1.0-3.0) | 1.3 (0.9-2.2)  2.0 (2.0-3.0)  2.0 (1.0-3.0)  1.0 (0.5-1.5)  1.0 (0.0-2.0)  1.3 (0.7-2.7)  1.0 (0.0-2.0)  1.0 (0.0-3.0)  1.0 (0.0-2.0)  1.0 (1.0-2.0)   1. (0.0-3.0)   1.0 (1.0-2.0) |
| ADDQol**e**, median (IQR), range -9 – +3   - Average Weighted Impact (AWI) - Leisure - Work - Journeys - Holidays - Physical - Family life - Friendships and social life - Personal relationship - Sex life - Physical appearance - Self-confidence - Motivation - Reactions of other people - Feelings about the future - Financial situation - Living conditions - Depend on others - Freedom to eat - Freedom to drink | -0.8 (-1.8 – -0.3)  0.0 (-2.0 – 0.0)  0.0 (-2.0 – 0.0)  0.0 (-2.0 – 0.0)  0.0 (-2.0 – 0.0)  -1.0 (-2.8 – 0.0)  0.0 (-2.0 – 0.0)  0.0 (-2.0 – 0.0)  0.0 (-2.0 – 0.0)  -1.0 (-3.0 – 0.0)  0.0 (0.0 – 0.0)  0.0 (0.0 – 0.0)  0.0 (-2.0 – 0.0)  0.0 (0.0 – 0.0)  -0.5 (-2.8 – 0.0)  0.0 (0.0 – 0.0)  0.0 (-2.0 – 0.0)  0.0 (0.0 – 0.0)  -2.0 (-4.0 – 0.0)  -1.0 (-2.0 – 0.0) | |

***a****Assessment of Burden of Chronic Conditions tool, high scores equal high burden,* ***b****Saint George Respiratory Questionnaire, high scores equal high burden,* ***c****Hospital Anxiety and Depression Scale, high scores equal possible (8-10) or probable (11-21) depression/anxiety,* ***d****Asthma Quality of Life Questionnaire, high scores equal low burden,****e****Audit of Diabetes-Dependent Quality of Life, high scores equal low burden*
