# Supplementary material for: Hitting The Bullseye: The Psychometric Properties of the Assessment of Burden of Chronic Conditions (ABCC)-Scale in The Netherlands
Source: Research Square preprint supplement (doi:10.21203/rs.3.rs-861720/v1), 2021-09-20
Supplement: Supplementary file 3 [file a37cc6ba3132d70bda9cb38f.docx]

**Additional file 2**: **Baseline characteristics – additional characteristics**

| **Condition** | **COPD** | **Asthma** | **T2DM** |
| --- | --- | --- | --- |
| **Total included, n** | **65** | **62** | **60** |
| Marital status, n (%)   - Single - Married - Divorced - Widowed | 4 (6.2)  54 (83.1)  5 (7.7)  2 (3.1) | 17 (27.4)  37 (59.7)  7 (11.3)  1 (1.6) | 10 (16.7)  38 (63.3)  7 (11.7)  5 (8.3) |
| Paid job   - Yes - No | 5 (7.7)  60 (92.3) | 20 (32.3)  42 (67.7) | 11 (18.3)  49 (81.7) |
| Retired   - Yes - No - Not applicable | 36 (55.4)  22 (33.8)  4 (6.2) | 14 (22.6)  27 (43.5)  19 (30.6) | 34 (56.7)  15 (25.0)  10 (16.7) |
| Treated by, n (%)   - General practitioner - Medical specialist | 11 (16.9)  52 (80.0) | 17 (27.4)  37 (59.7) | 48 (80.0)  10 (16.7) |
| Emergency visit exacerbation, previous year, n (%)   - 0 - 1 - 2 - >2 | 43 (66.2)  13 (20.0)  6 (9.2)  3 (4.6) | 55 (88.7)  5 (8.1)  1 (1.6)  1 (1.6) | -  -  -  - |
| Hospital admission exacerbation, previous year, n (%)   - 0 - 1 - 2 - >2 | 48 (73.8)  13 (20.0)  2 (3.1)  2 (3.1) | 57 (91.9)  3 (4.8)  1 (1.6)  1 (1.6) | -  -  -  - |
| Asthma control (based on GINA**a**(28))   - Controlled - Partially controlled - Not controlled | N/a  N/a  N/a | 12 (19.4)  6 (9.7)  43 (69.4) | N/a  N/a  N/a |
| Body Mass Index, kg/m2, n (%)   - Underweight (<18.5) - Normal weight (18.5-24.9) - Overweight (25.0-29.9) - Obesity (30.0-39.9) - Morbid obesity (≥40) | -  -  -  -  - | -  -  -  -  - | 2 (3.3)  29 (48.3)  13 (21.7)  14 (23.3)  2 (3.3) |
| Complications, n (%)   - Nephropathy - Neuropathy - Retinopathy - Sexual problems - Amputation - Diabetic foot / foot ulcers - Cardiovascular disease | -  -  -  -  -  -  - | -  -  -  -  -  -  - | 7 (11.7)  18 (30)  17 (28.3)  23 (38.3)  0 (0)  5 (8.3)  29 (48.3) |

***a****Global Initiative for Asthma global strategy for asthma management and prevention, 2021 update (28)*
